# Supplementary material for: On the weak O–H⋯halogen hydrogen bond: a rotational study of CH3CHClF⋯H2O
Source: Royal Society of Chemistry journal article supplement (doi:10.1039/c1cp20751b), 2011-01-01
Supplement: c1cp20751b.pdf [file c1cp20751b.pdf]

# On the weak O-H...Halogen Hydrogen Bond. A rotational study of CH<sub>3</sub>CHClF...H<sub>2</sub>O

Gang Feng, Luca Evangelisti, Laura B. Favero, Jens-Uwe Grabow, Zhining Xia, Walther Caminati,\*<sup>a</sup>

## Electronic Supplementary Information

- Table of MP2/6-311++G(d, p) calculated principal axes coordinates (Å) of CFE-W.
- Table of transitions of all the observed isotopologues.

Table S1: MP2/6-311++G(d, p) principal axes coordinates (Å) of CFE-W.

| Conform I |         |         |         | Conform II |         |         |         | Conform III |         |         |         |
|-----------|---------|---------|---------|------------|---------|---------|---------|-------------|---------|---------|---------|
| Atom      | X       | Y       | Z       | Atom       | X       | Y       | Z       | Atom        | X       | Y       | Z       |
| C         | -0.0926 | -0.1356 | 0.1312  | C          | 0.4556  | -0.4464 | 0.2022  | C           | 0.5647  | 0.7549  | 0.2179  |
| Cl        | -1.8232 | 0.2334  | 0.2699  | Cl         | 0.1574  | 1.2650  | -0.2149 | C           | -0.0925 | 1.3402  | -1.0030 |
| F         | 0.4546  | 0.7270  | -0.8085 | F          | 1.7330  | -0.5417 | 0.7080  | Cl          | 1.4034  | -0.7638 | -0.1501 |
| H         | 0.3712  | 0.1014  | 1.0862  | H          | -0.2441 | -0.6961 | 0.9959  | F           | -0.3995 | 0.4901  | 1.1814  |
| C         | 0.1401  | -1.5568 | -0.3040 | H          | 0.5446  | -2.3596 | -0.7149 | O           | -2.6624 | -0.7174 | -0.3022 |
| H         | -0.2886 | -2.2419 | 0.4299  | C          | 0.3145  | -1.3314 | -1.0063 | H           | 1.2942  | 1.4163  | 0.6836  |
| H         | 1.2159  | -1.7301 | -0.3737 | H          | 1.0080  | -1.0120 | -1.7867 | H           | -0.6032 | 2.2646  | -0.7209 |
| H         | -0.3328 | -1.7296 | -1.2727 | H          | -0.7105 | -1.2854 | -1.3750 | H           | -0.8209 | 0.6350  | -1.4062 |
| O         | 2.9451  | 0.1682  | 0.4778  | O          | -2.6315 | -0.4447 | 0.3595  | H           | 0.6641  | 1.5632  | -1.7576 |
| H         | 2.6038  | 0.7591  | -0.1997 | H          | -2.5906 | 0.5087  | 0.2452  | H           | -2.0858 | -0.5652 | 0.4525  |
| H         | 3.8144  | 0.5208  | 0.6801  | H          | -3.5422 | -0.6103 | 0.6143  | H           | -2.9809 | -1.6127 | -0.1697 |

Table S2: Transitions of all the observed isotopomers

| $J'_{Ka'Kc'}$   | $F'$ | $J''_{Ka''Kc''}$ | $F''$ | normal     | $^{37}\text{Cl-H}_2\text{O}$ | $\text{H}_2\text{O}^{18}$ | HOD        | DOD        | DOH        |
|-----------------|------|------------------|-------|------------|------------------------------|---------------------------|------------|------------|------------|
| 3 <sub>03</sub> | 3    | 2 <sub>02</sub>  | 2     | 9207.6883  | 9024.9998                    | 8730.8263                 | 8820.4358  | 8652.7665  | 9020.4499  |
| 3 <sub>03</sub> | 2    | 2 <sub>02</sub>  | 1     | 9207.7173  | 9025.0028                    | 8730.8581                 | 8820.4658  | 8652.7963  | 9020.4630  |
| 3 <sub>03</sub> | 4    | 2 <sub>02</sub>  | 3     | 9211.6299  | 9028.1173                    | 8734.7624                 | 8824.3694  | 8656.7023  | 9024.4005  |
| 3 <sub>03</sub> | 5    | 2 <sub>02</sub>  | 4     | 9211.6559  | 9028.1405                    | 8734.7919                 | 8824.4054  | 8656.7350  | 9024.4262  |
| 3 <sub>13</sub> | 3    | 2 <sub>12</sub>  | 2     | 9003.5238  | 8828.4709                    | 8548.3547                 | 8632.7994  | 8467.1568  | 8818.7231  |
| 3 <sub>13</sub> | 4    | 2 <sub>12</sub>  | 3     | 9003.7612  | 8828.6525                    | 8548.5909                 | 8633.0133  | 8467.3979  | 8818.9479  |
| 3 <sub>13</sub> | 2    | 2 <sub>12</sub>  | 1     | 9007.4855  | 8831.5966                    |                           | 8636.7029  |            |            |
| 3 <sub>13</sub> | 5    | 2 <sub>12</sub>  | 4     | 9007.7401  | 8831.7988                    | 8552.5518                 | 8636.9676  | 8471.3537  | 8822.9130  |
| 3 <sub>12</sub> | 4    | 2 <sub>11</sub>  | 3     | 9434.6379  | 9242.3308                    | 8931.5698                 | 9027.4156  | 8857.2555  |            |
| 3 <sub>12</sub> | 3    | 2 <sub>11</sub>  | 2     | 9434.6576  | 9242.3423                    | 8931.5920                 | 9027.4346  | 8857.2702  |            |
| 3 <sub>12</sub> | 2    | 2 <sub>11</sub>  | 1     | 9438.6184  | 9245.4713                    |                           | 9031.3682  | 8861.2007  |            |
| 3 <sub>12</sub> | 5    | 2 <sub>11</sub>  | 4     | 9438.6316  | 9245.4819                    | 8935.5316                 | 9031.3886  | 8861.2110  |            |
| 4 <sub>04</sub> | 4    | 3 <sub>03</sub>  | 3     | 12265.1645 | 12022.1348                   | 11632.4798                | 11751.2571 | 11528.0109 | 12015.9482 |
| 4 <sub>04</sub> | 3    | 3 <sub>03</sub>  | 2     | 12265.1867 | 12022.1529                   | 11632.5073                | 11751.2844 | 11528.0198 | 12015.9766 |
| 4 <sub>04</sub> | 5    | 3 <sub>03</sub>  | 4     | 12267.0054 | 12023.5922                   | 11634.3198                | 11753.0897 | 11529.8402 | 12017.7806 |
| 4 <sub>04</sub> | 6    | 3 <sub>03</sub>  | 5     | 12267.0318 | 12023.6184                   | 11634.3424                | 11753.1159 | 11529.8671 | 12017.8093 |
| 4 <sub>14</sub> | 4    | 3 <sub>13</sub>  | 3     | 12002.7480 | 11769.2441                   | 11396.6181                | 11509.0105 | 11288.2572 | 11756.4140 |
| 4 <sub>14</sub> | 5    | 3 <sub>13</sub>  | 4     | 12003.6238 | 11769.9410                   | 11397.4922                | 11509.8860 | 11289.1466 | 11757.3052 |
| 4 <sub>14</sub> | 3    | 3 <sub>13</sub>  | 2     | 12004.3340 | 11770.5007                   | 11398.1956                | 11510.5850 |            | 11758.0039 |
| 4 <sub>14</sub> | 6    | 3 <sub>13</sub>  | 5     | 12005.2244 | 11771.2027                   | 11399.0814                | 11511.4733 | 11290.7294 | 11758.8960 |
| 4 <sub>13</sub> | 4    | 3 <sub>12</sub>  | 3     | 12577.2070 |                              | 11907.2709                | 12034.8853 | 11808.1036 | 12323.7119 |
| 4 <sub>13</sub> | 5    | 3 <sub>12</sub>  | 4     | 12577.9650 |                              | 11908.0234                | 12035.6412 | 11808.8468 | 12324.4633 |
| 4 <sub>13</sub> | 3    | 3 <sub>12</sub>  | 2     | 12578.7834 | 12322.0040                   |                           |            | 11809.6712 | 12325.2878 |
| 4 <sub>13</sub> | 6    | 3 <sub>12</sub>  | 5     | 12579.5648 | 12322.6239                   | 11909.6172                | 12037.2307 | 11810.4356 | 12326.0574 |
| 5 <sub>05</sub> | 5    | 4 <sub>04</sub>  | 4     | 15309.0720 | 15006.9158                   |                           |            |            | 14998.1961 |
| 5 <sub>05</sub> | 4    | 4 <sub>04</sub>  | 3     | 15309.1000 | 15006.9444                   |                           |            |            | 14998.2216 |
| 5 <sub>05</sub> | 6    | 4 <sub>04</sub>  | 5     | 15310.1587 | 15007.7719                   |                           |            |            | 14999.2838 |
| 5 <sub>05</sub> | 7    | 4 <sub>04</sub>  | 6     | 15310.1918 | 15007.7918                   |                           |            |            | 14999.3141 |
| 5 <sub>15</sub> | 5    | 4 <sub>14</sub>  | 4     | 14998.4973 |                              |                           |            |            |            |
| 5 <sub>15</sub> | 6    | 4 <sub>14</sub>  | 5     | 14999.2204 |                              |                           |            |            |            |
| 5 <sub>15</sub> | 4    | 4 <sub>14</sub>  | 3     | 14999.2735 |                              |                           |            |            |            |
| 5 <sub>15</sub> | 7    | 4 <sub>14</sub>  | 6     | 15000.0358 |                              |                           |            |            |            |
| 6 <sub>16</sub> | 6    | 5 <sub>15</sub>  | 5     | 17990.2788 | 17640.8364                   | 17084.2063                |            | 16921.3410 | 17621.2343 |
| 6 <sub>16</sub> | 5    | 5 <sub>15</sub>  | 4     | 17990.7698 | 17641.2168                   | 17084.6879                |            | 16921.8354 | 17621.7198 |
| 6 <sub>16</sub> | 7    | 5 <sub>15</sub>  | 6     | 17990.8660 | 17641.2949                   | 17084.7874                |            | 16921.9347 | 17621.8190 |
| 6 <sub>16</sub> | 8    | 5 <sub>15</sub>  | 7     | 17991.3071 | 17641.6497                   | 17085.2252                | 17253.0767 | 16922.3671 | 17622.2605 |
| 4 <sub>23</sub> | 5    | 3 <sub>22</sub>  | 4     | 12291.6118 | 12046.8896                   |                           |            |            |            |
| 4 <sub>23</sub> | 4    | 3 <sub>22</sub>  | 3     | 12293.8681 | 12048.6548                   |                           |            |            |            |
| 4 <sub>23</sub> | 6    | 3 <sub>22</sub>  | 5     | 12297.9811 | 12051.9167                   |                           |            |            |            |
| 4 <sub>23</sub> | 3    | 3 <sub>22</sub>  | 2     | 12300.1778 |                              |                           |            |            |            |
| 4 <sub>22</sub> | 5    | 3 <sub>21</sub>  | 4     | 12322.6238 | 12075.4300                   |                           |            |            |            |
| 4 <sub>22</sub> | 4    | 3 <sub>21</sub>  | 3     | 12324.8401 | 12077.1834                   |                           |            |            |            |
| 4 <sub>22</sub> | 6    | 3 <sub>21</sub>  | 5     | 12328.9500 | 12080.4338                   |                           |            |            |            |
| 4 <sub>22</sub> | 3    | 3 <sub>21</sub>  | 2     | 12331.1739 | 12082.1910                   |                           |            |            |            |
| 5 <sub>14</sub> | 5    | 4 <sub>13</sub>  | 4     | 15715.9536 | 15395.7088                   |                           |            |            | 15399.2712 |
| 5 <sub>14</sub> | 6    | 4 <sub>13</sub>  | 5     | 15716.6297 | 15396.2495                   |                           |            |            | 15399.9472 |
| 5 <sub>14</sub> | 4    | 4 <sub>13</sub>  | 3     | 15716.7712 | 15396.3593                   |                           |            |            | 15400.0913 |
| 5 <sub>14</sub> | 7    | 4 <sub>13</sub>  | 6     | 15717.4183 | 15396.8694                   |                           | 15040.5802 |            | 15400.7319 |
| 5 <sub>24</sub> | 6    | 4 <sub>23</sub>  | 5     | 15363.5009 |                              |                           |            |            |            |
| 5 <sub>24</sub> | 5    | 4 <sub>23</sub>  | 4     | 15363.9380 |                              |                           |            |            |            |
| 5 <sub>23</sub> | 6    | 4 <sub>22</sub>  | 5     | 15425.2655 |                              |                           |            |            |            |
| 5 <sub>23</sub> | 5    | 4 <sub>22</sub>  | 4     | 15425.7341 |                              |                           |            |            |            |
| 5 <sub>23</sub> | 7    | 4 <sub>22</sub>  | 6     | 15428.4280 |                              |                           |            |            |            |
| 5 <sub>23</sub> | 4    | 4 <sub>22</sub>  | 3     | 15428.8714 |                              |                           |            |            |            |
| 6 <sub>06</sub> | 7    | 5 <sub>05</sub>  | 6     |            |                              | 17402.3210                |            |            | 17966.2612 |
| 6 <sub>06</sub> | 8    | 5 <sub>05</sub>  | 7     |            |                              | 17402.3507                |            |            | 17966.2933 |
| 6 <sub>06</sub> | 6    | 5 <sub>05</sub>  | 5     |            |                              | 17401.5972                |            | 17243.2250 | 17965.5394 |
| 6 <sub>06</sub> | 5    | 5 <sub>05</sub>  | 4     |            |                              | 17401.6292                |            | 17243.2595 | 17965.5735 |
| 3 <sub>21</sub> | 5    | 2 <sub>20</sub>  | 4     |            |                              |                           | 8849.2830  |            | 9052.7342  |
| 3 <sub>22</sub> | 5    | 2 <sub>21</sub>  | 4     |            |                              |                           |            |            | 9040.6624  |
